# Supplementary material for: Activated hepatic stellate cells promote epithelial-to-mesenchymal transition in hepatocellular carcinoma through transglutaminase 2-induced pseudohypoxia
Source: PubMed Central journal article supplement (PMC6202353; doi:10.1038/s42003-018-0177-5), 2018-10-25
Supplement: 42003_2018_177_MOESM1_ESM.pdf [file 42003_2018_177_MOESM1_ESM.pdf]

## Supplementary information

### Supplementary Figure 1

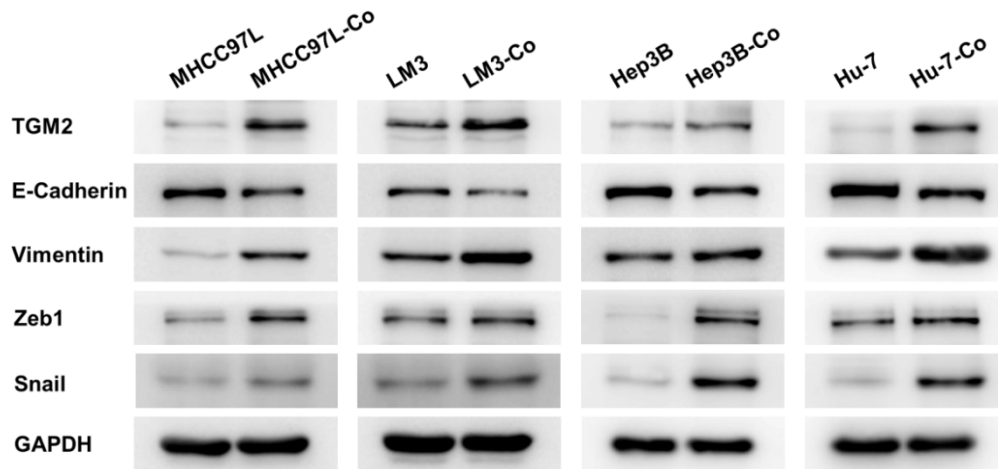

**Supplementary Figure 1. Activated hepatic stellate cells promote EMT and TGM2 upregulation in HCC cells.** Lower E-cadherin and higher TGM2, Vimentin, Zeb1 and Snail expression levels in HCC cells (MHCC97L, LM3, Hep3B and Hu-7) co-cultured with hepatic stellate cells (western blotting).

### Supplementary Figure 2

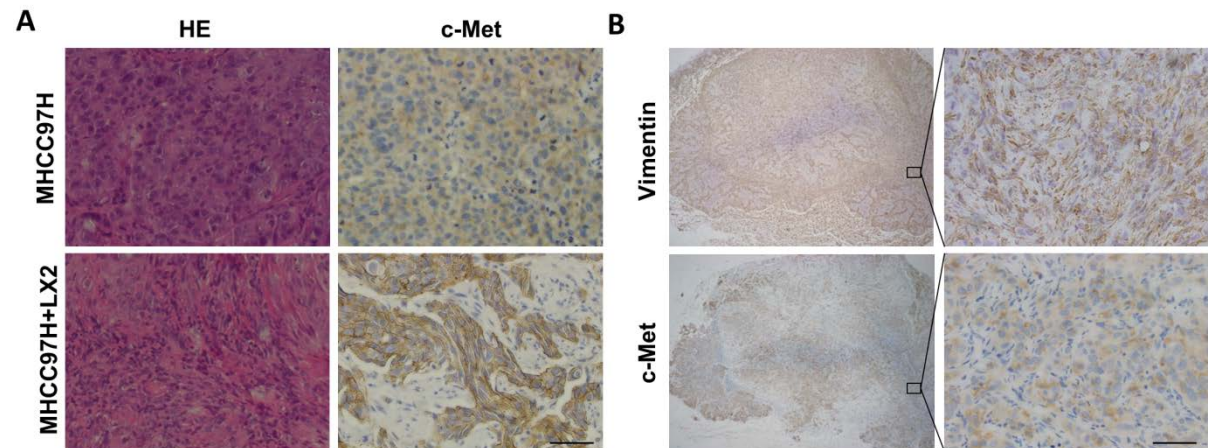

**Supplementary Figure 2. c-Met expression in tumours spawned by combined injection of HCC cells and hepatic stellate cells into nude mice.** (A) Haematoxylin and eosin (HE)-stained images and immunostaining of c-Met are shown (scale bar, 50µm). (B) Immunostaining images of Vimentin and c-Met are shown in the serial sections (scale bar, 50µm).

### Supplementary Figure 3

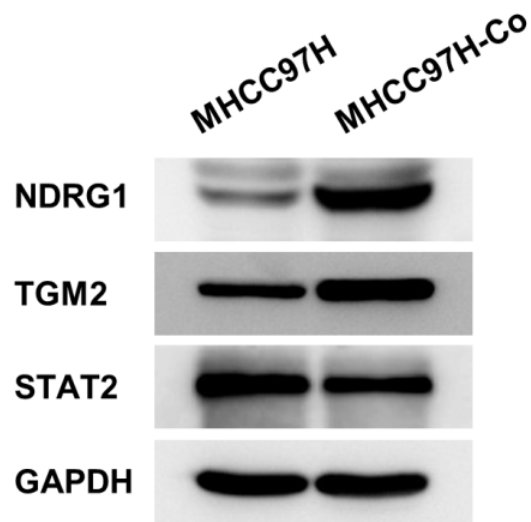

Supplementary Figure 3. Accuracy of mass spectra results was validated of NDRG1, TGM2, and STAT2 (western blotting).

### Supplementary Figure 4

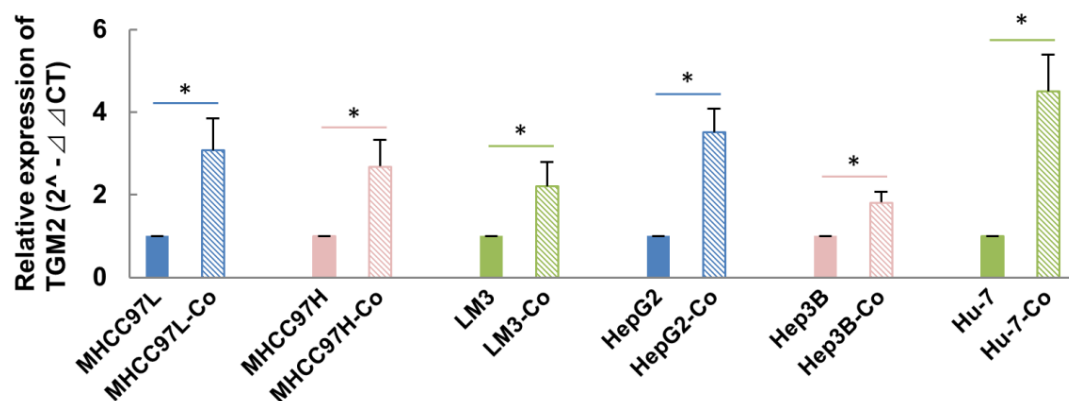

Supplementary Figure 4. Activated hepatic stellate cells promote TGM2 mRNA upregulation in HCC cells. Higher TGM2 expression at mRNA levels in HCC cells (MHCC97L, MHCC97H, LM3, HepG2, Hep3B and Hu-7) co-cultured with hepatic stellate cells (quantitative real-time Polymerase Chain Reaction).

### Supplementary Figure 5

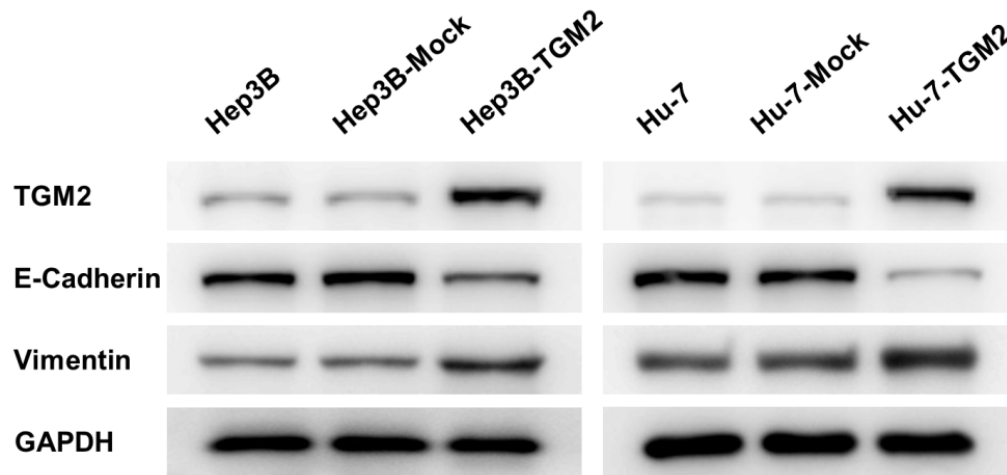

**Supplementary Figure 5. TGM2 upregulation promotes EMT in HCC cells.** Lower E-cadherin and higher Vimentin expression levels in Hep3B-TGM2 OE and Hu-7-TGM2 OE cells, compared with Hep3B-Mock and Hu-7-Mock cells, respectively (western blotting).

### Supplementary Figure 6

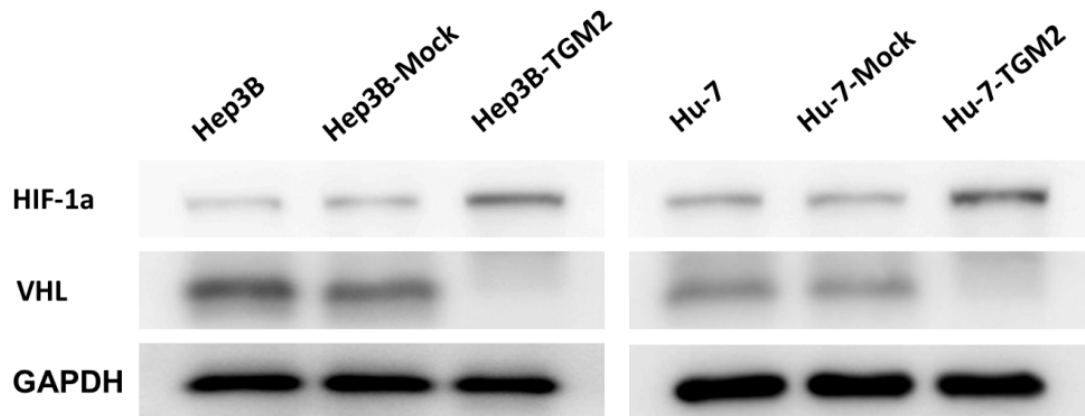

**Supplementary Figure 6. TGM2 upregulation results in the accumulation of HIF-1a in HCC cells** Higher HIF-1a and lower VHL expression levels in Hep3B-TGM2 OE and Hu-7-TGM2 OE cells, compared with Hep3B-Mock and Hu-7-Mock cells, respectively (western blotting).

### Supplementary Figure 7

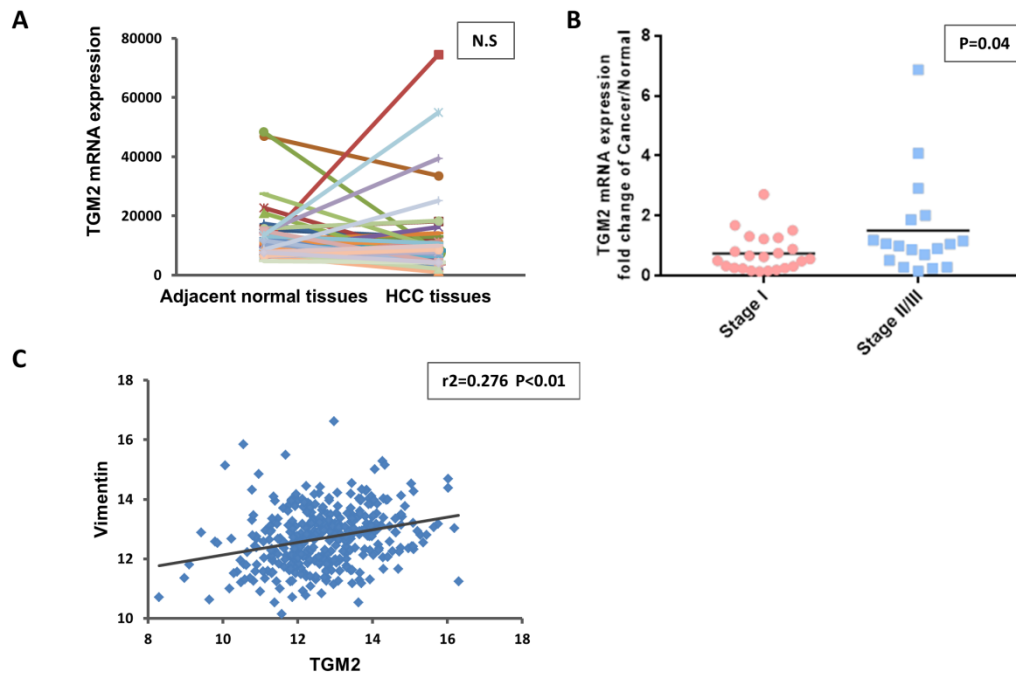

Supplementary Figure 7. (A) The expression of TGM2 in HCC tissues and adjacent normal tissues from TCGA (no significance). (B) The TGM2 expression ratio of HCC to adjacent normal tissues in HCC with different TNM stages from TCGA ( $P=0.04$ ). (C) The Spearman's correlation analysis between Vimentin and TGM2 expression in 371 HCC samples from TCGA ( $P<0.01$ ).

### Supplementary Figure 8

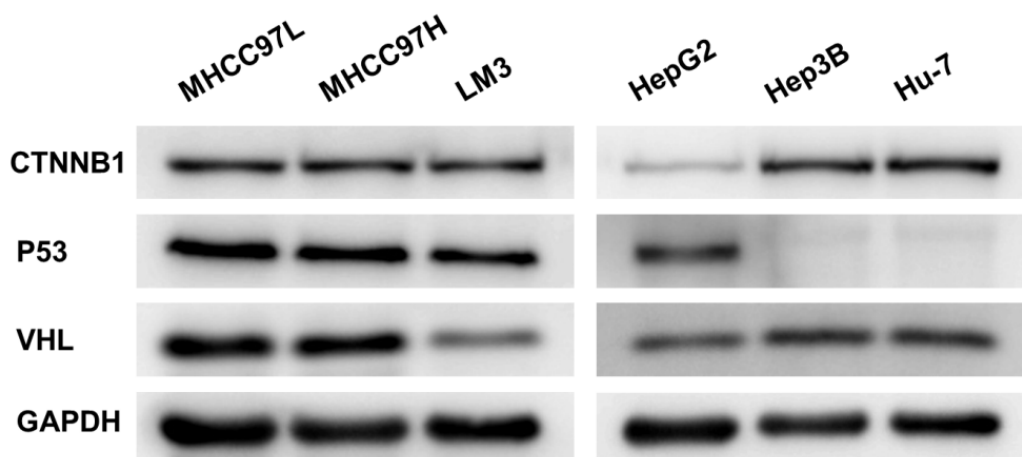

Supplementary Figure 8. CTNNB1, P53 and VHL expression in HCC cell lines (MHCC97L, MHCC97H, LM3, HepG2, Hep3B and Hu-7) (western blotting).

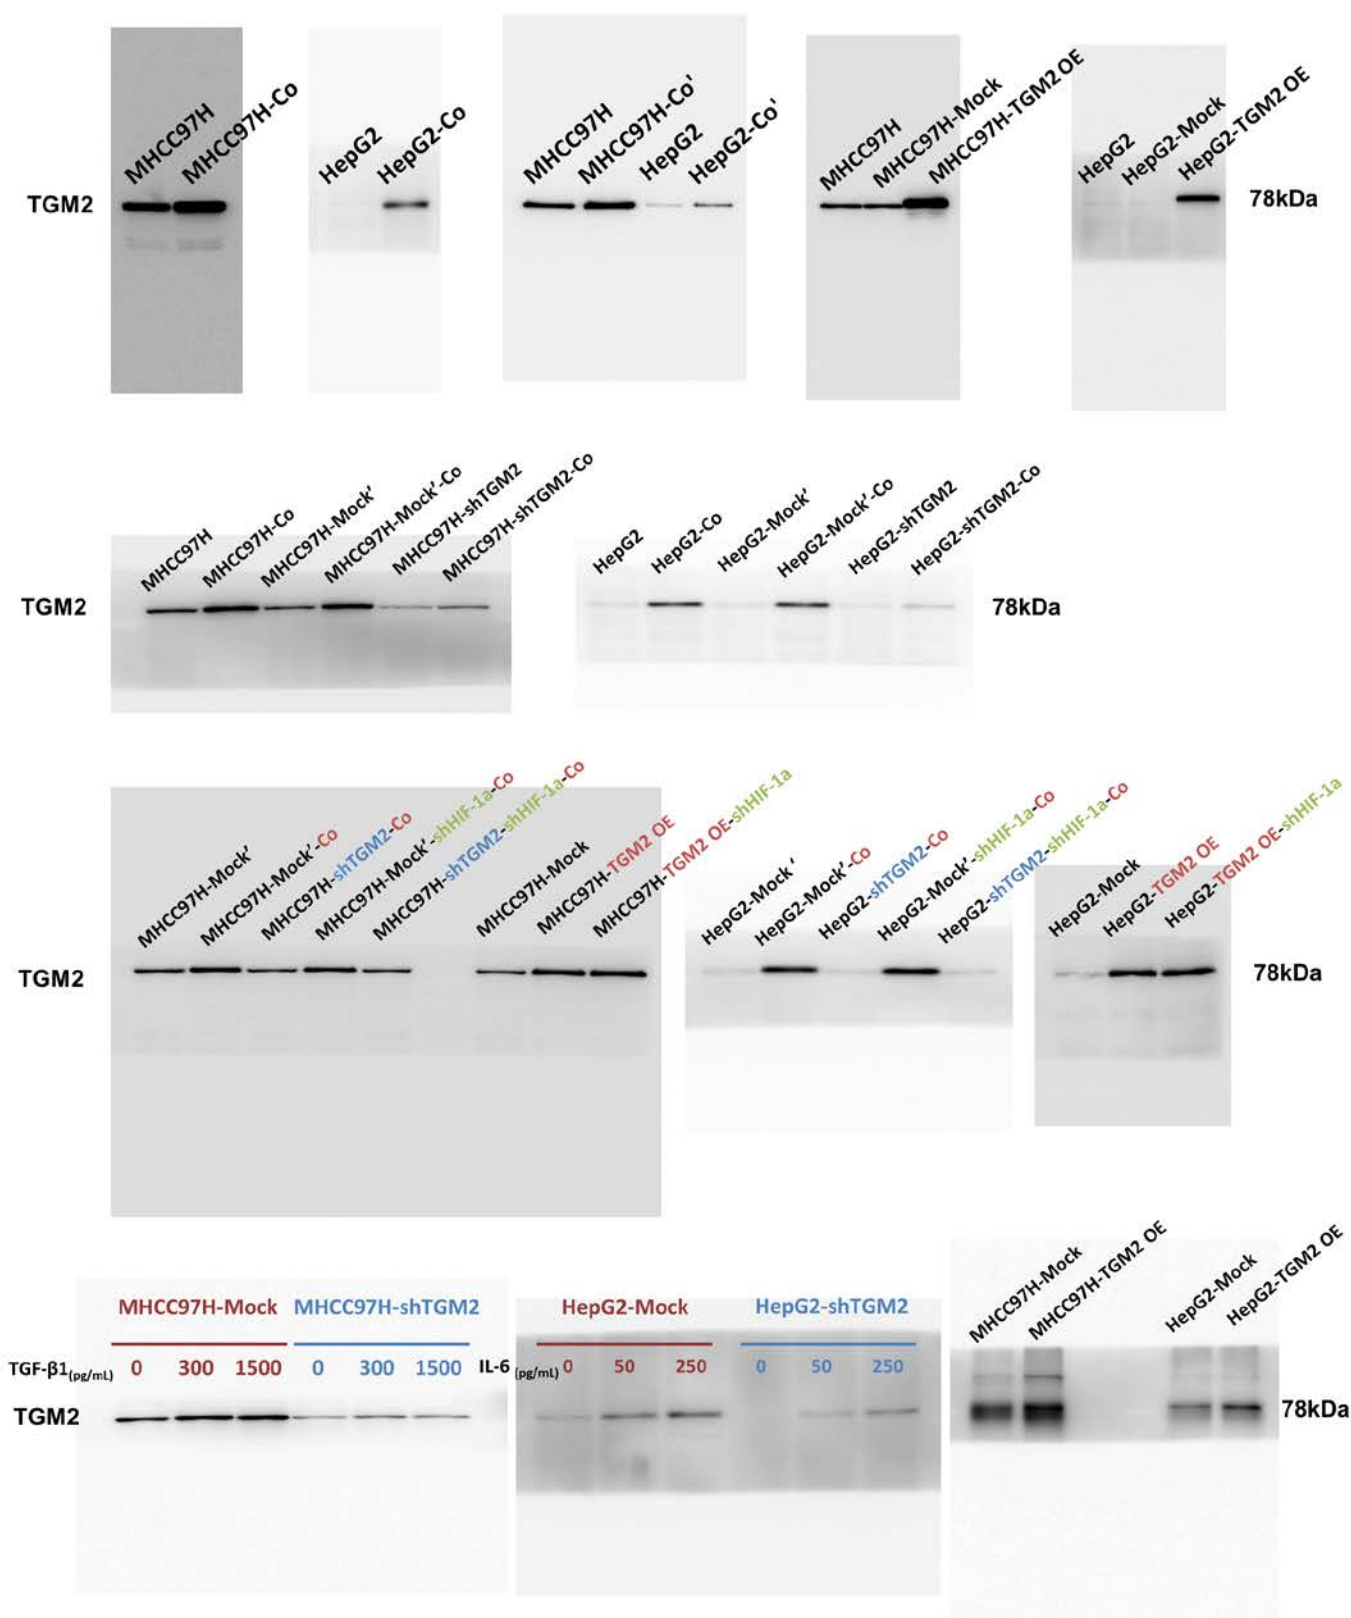

Supplementary Figure 9. Original blot images corresponding to western blots presented in the main figures.

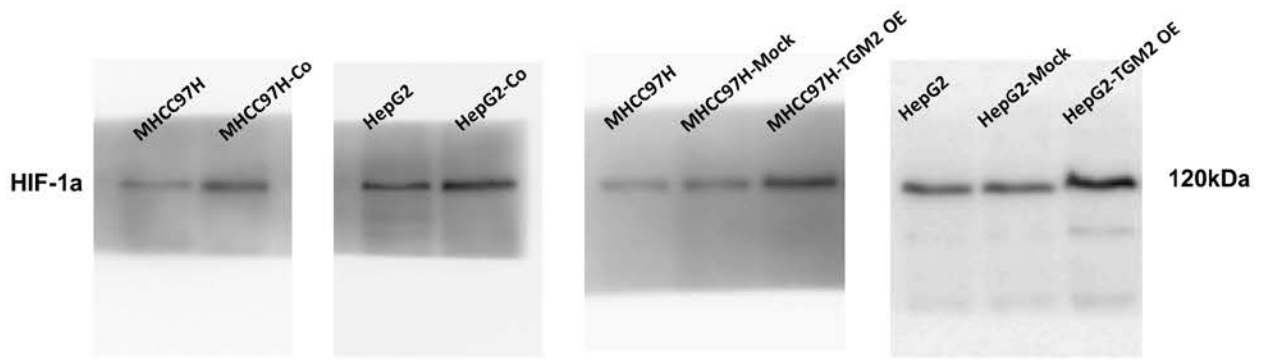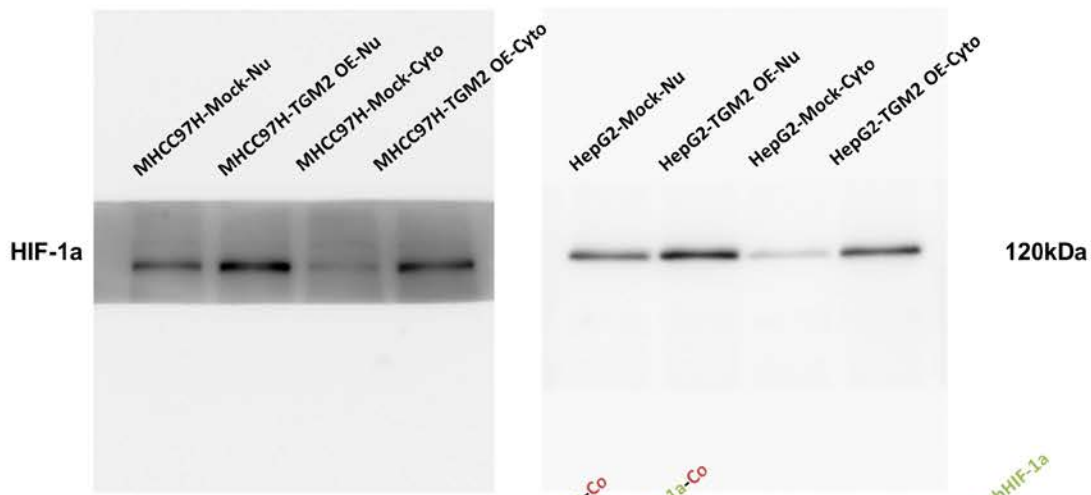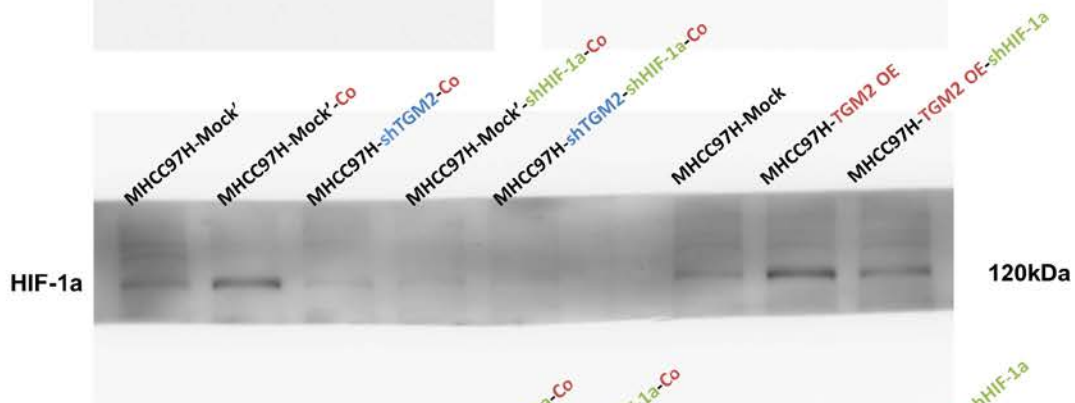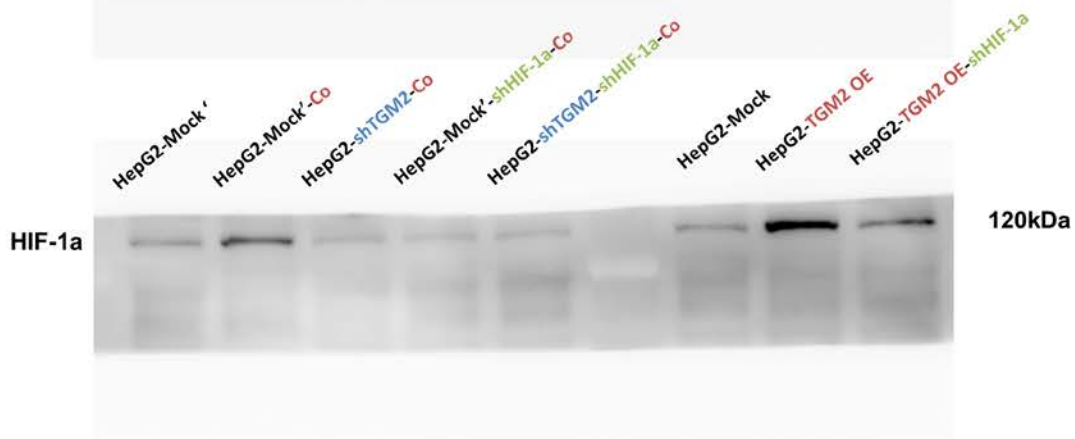

Supplementary Figure 9 continued

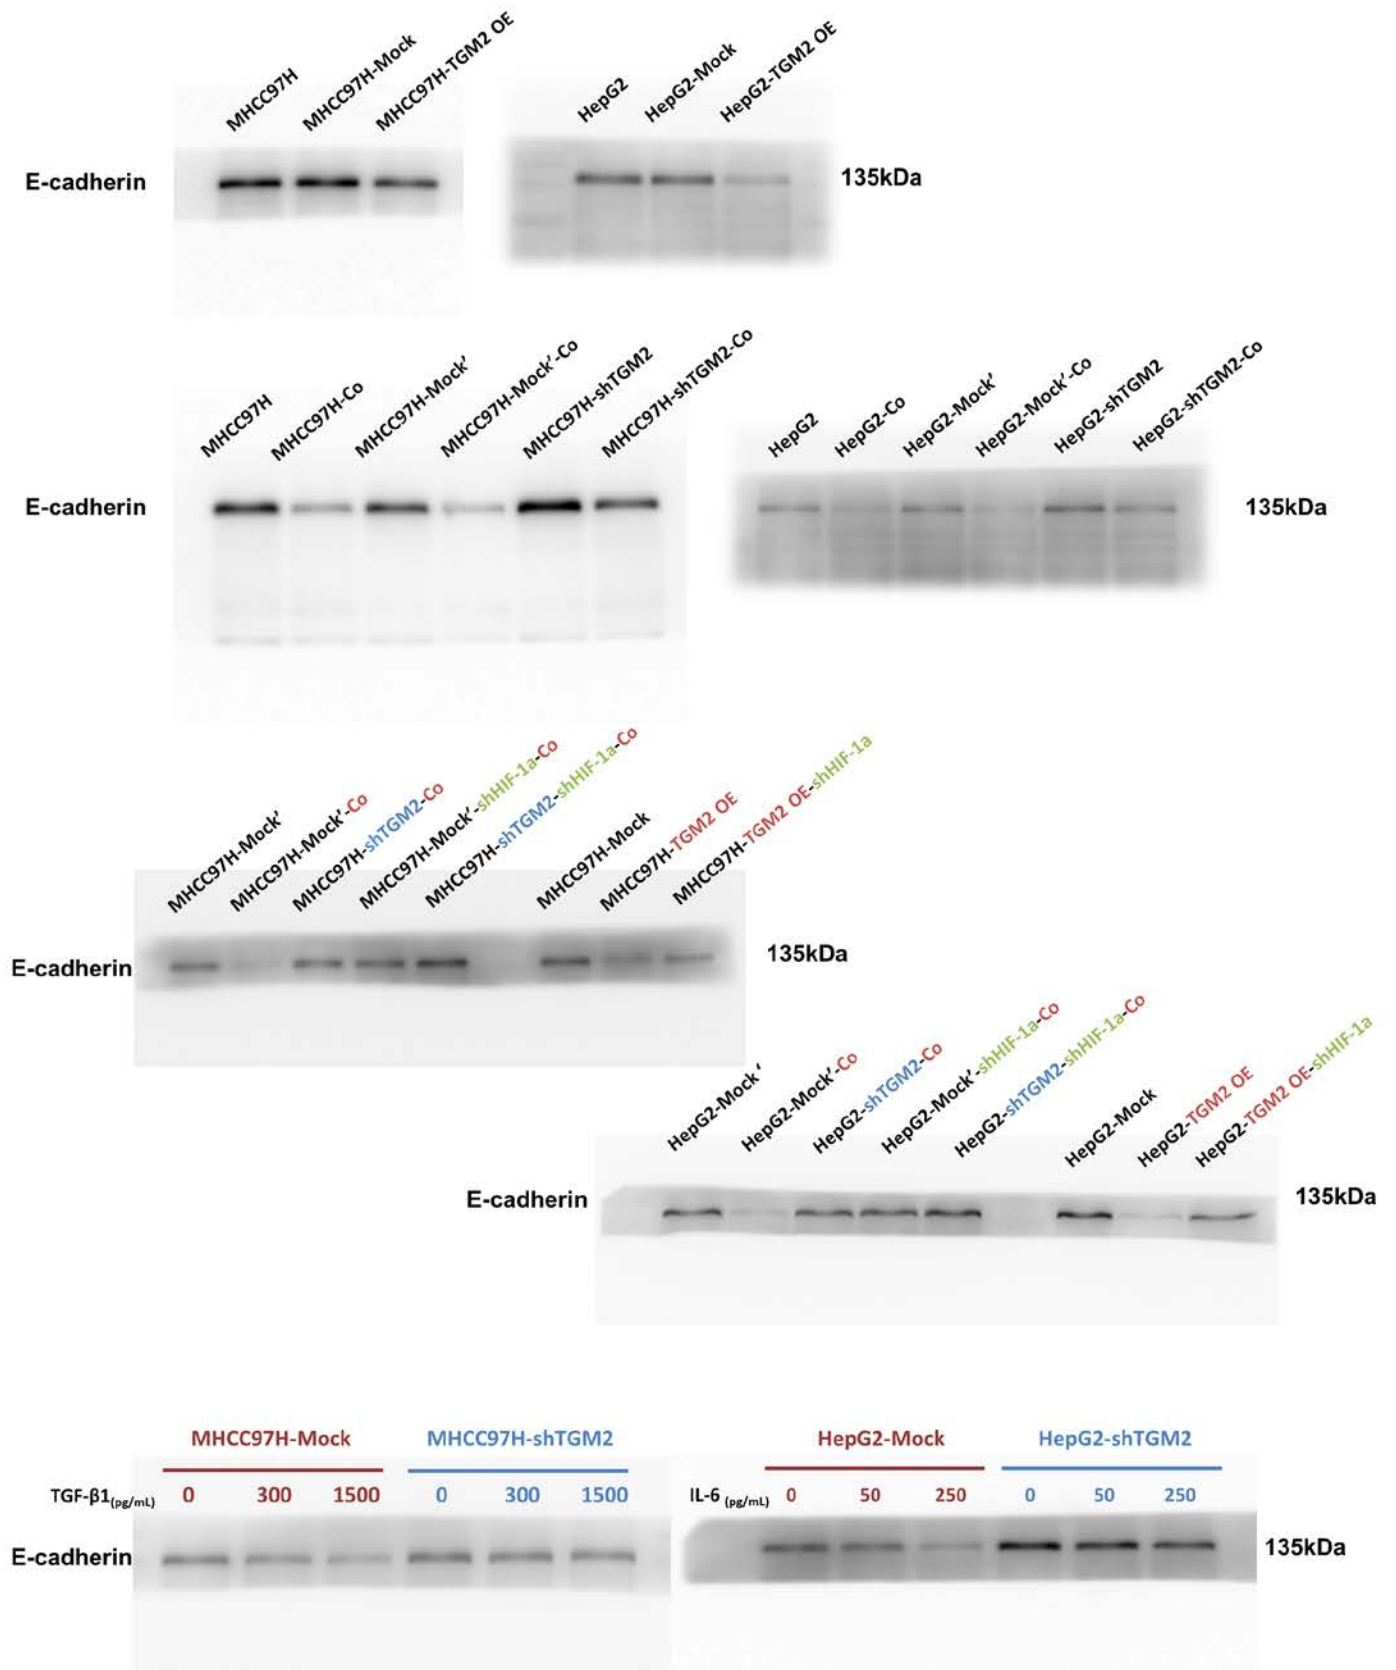

Supplementary Figure 9 continued



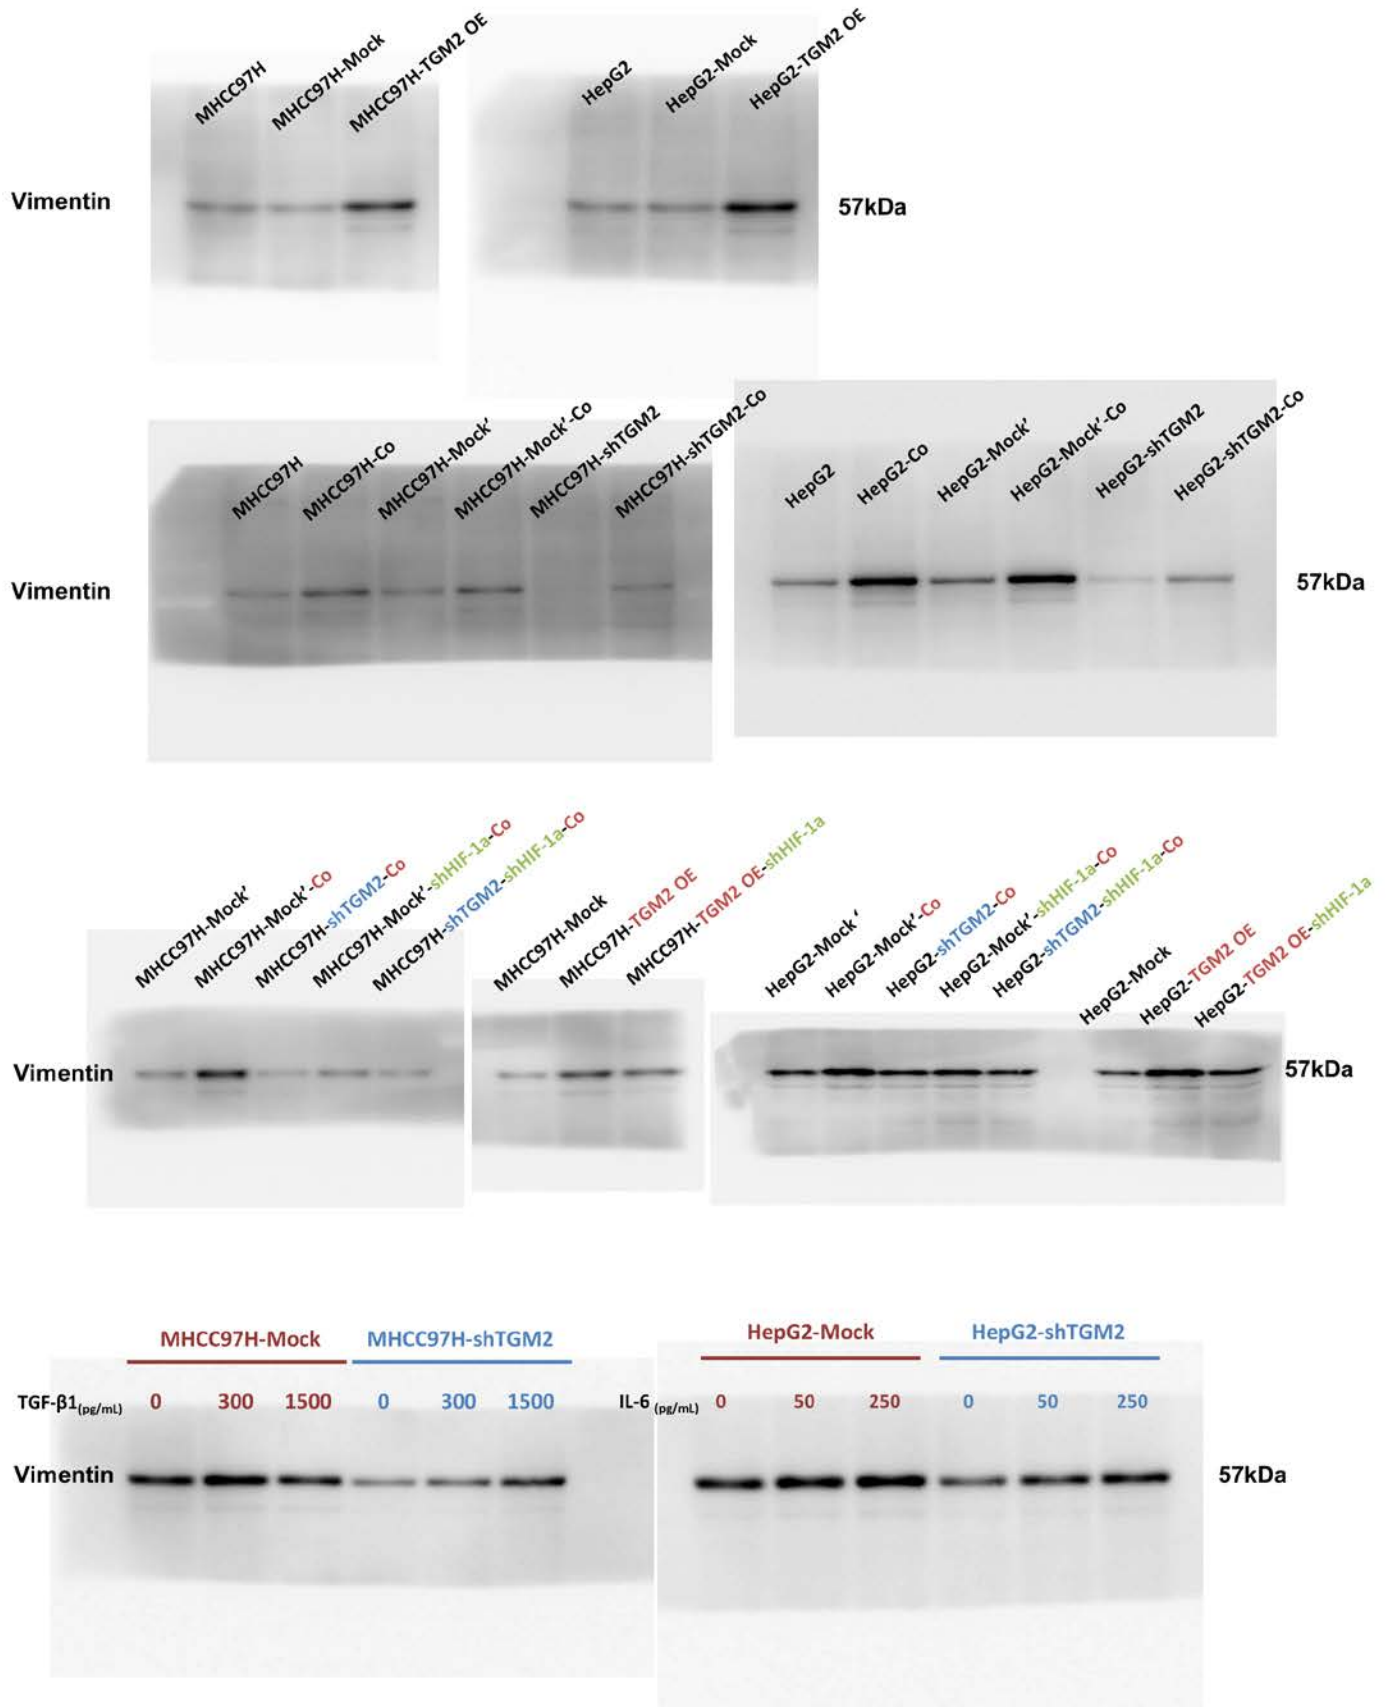

Supplementary Figure 9 continued



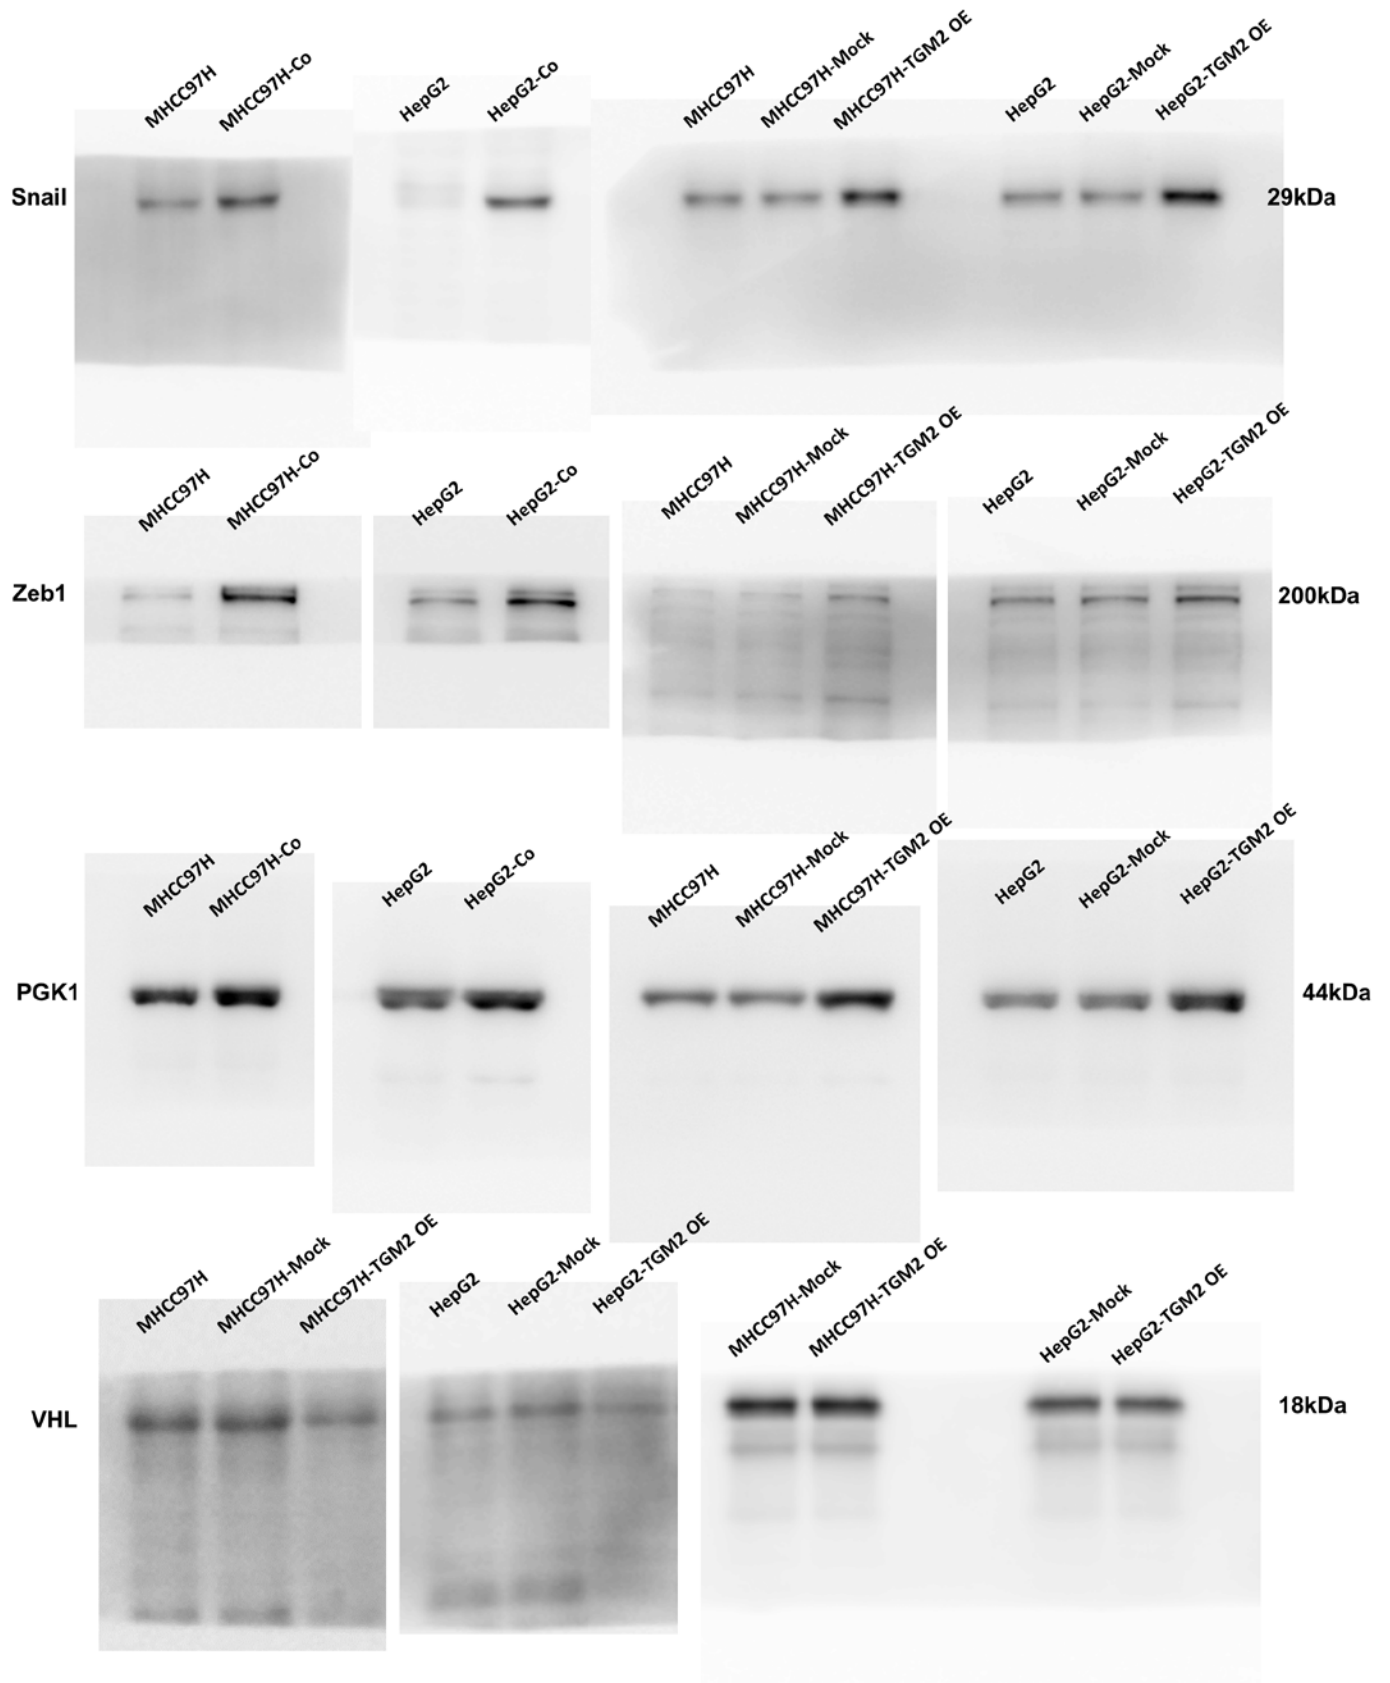

Supplementary Figure 9 continued

**Supplementary Table 1. List of the up-regulated Proteins**

| Accession | Symbol | Ratio | Accession | Symbol | Ratio |
|-----------|--------|-------|-----------|--------|-------|
| Q9Y2L5    | TPPC8  | 5.57  | Q9BVM2    | DPCD   | 2.20  |
| O95208    | EPN2   | 5.26  | Q6PI78    | TMM65  | 2.20  |
| Q9Y3B7    | RM11   | 4.98  | Q02952    | AKA12  | 2.19  |
| Q8TD19    | NEK9   | 4.75  | P08648    | ITA5   | 2.17  |
| Q92597    | NDRG1  | 4.63  | Q86X76    | NIT1   | 2.16  |
| Q16790    | CAH9   | 4.49  | Q9Y6N5    | SQRD   | 2.16  |
| O00584    | RNT2   | 4.25  | P05362    | ICAM1  | 2.12  |
| P12694    | ODBA   | 3.70  | Q5SSJ5    | HP1B3  | 2.10  |
| P00450    | CERU   | 3.36  | Q16795    | NDUA9  | 2.10  |
| P19793    | RXRA   | 3.24  | P12109    | CO6A1  | 2.06  |
| P15941    | MUC1   | 3.15  | P10451    | SPP1   | 2.03  |
| O43678    | NDUA2  | 3.05  | Q96JD6    | AKCL2  | 2.02  |
| P09972    | ALDOC  | 2.91  | O15427    | MOT4   | 2.01  |
| Q6GMV2    | SMYD5  | 2.88  | Q5MNZ6    | WIPI3  | 2.01  |
| P50895    | BCAM   | 2.86  | Q16134    | ETFD   | 1.99  |
| Q02318    | CP27A  | 2.68  | O95747    | OXSRI  | 1.96  |
| P04179    | SODM   | 2.65  | Q15047    | SETB1  | 1.94  |
| O00469    | PLOD2  | 2.59  | Q07954    | LRP1   | 1.93  |
| P21980    | TGM2   | 2.58  | Q92797    | SYMPK  | 1.92  |
| O15460    | P4HA2  | 2.50  | O60936    | NOL3   | 1.88  |
| P55263    | ADK    | 2.50  | Q13492    | PICAL  | 1.86  |
| P13674    | P4HA1  | 2.49  | Q68CZ2    | TENS3  | 1.85  |
| Q96HE7    | ERO1A  | 2.45  | Q9Y376    | CAB39  | 1.85  |
| P09104    | ENOG   | 2.45  | Q96J84    | KIRR1  | 1.84  |
| Q9P2R7    | SUCB1  | 2.41  | P50224    | ST1A3  | 1.84  |
| P51580    | TPMT   | 2.33  | P04080    | CYTB   | 1.80  |
| C9JLW8    | F195B  | 2.32  | P11166    | GTR1   | 1.79  |
| Q96A26    | F162A  | 2.31  | P00558    | PGK1   | 1.77  |
| Q03426    | KIME   | 2.29  | O43809    | CPSF5  | 1.77  |
| Q9BQE5    | APOL2  | 2.23  | Q5TBC7    | B2L15  | 1.77  |

**Supplementary Table 1 (continue)**

| <b>Accession</b> | <b>Symbol</b> | <b>Ratio</b> | <b>Accession</b> | <b>Symbol</b> | <b>Ratio</b> |
|------------------|---------------|--------------|------------------|---------------|--------------|
| P34949           | MPI           | 1.76         | O75886           | STAM2         | 1.60         |
| P09493           | TPM1          | 1.76         | P63220           | RS21          | 1.60         |
| Q14195           | DPYL3         | 1.76         | P00403           | COX2          | 1.59         |
| O43760           | SNG2          | 1.75         | Q9BVK6           | TMED9         | 1.57         |
| Q6UXV4           | APOOL         | 1.73         | Q9Y3E5           | PTH2          | 1.55         |
| P35914           | HMGCL         | 1.71         | P02751           | FINC          | 1.55         |
| Q9Y487           | VPP2          | 1.71         | P46736           | BRCC3         | 1.55         |
| Q08722           | CD47          | 1.71         | P10619           | PPGB          | 1.55         |
| P07093           | GDN           | 1.71         | P27105           | STOM          | 1.54         |
| Q12907           | LMAN2         | 1.70         | Q14764           | MVP           | 1.54         |
| P29966           | MARCS         | 1.70         | Q6ZMU5           | TRI72         | 1.53         |
| P06737           | PYGL          | 1.69         | P53004           | BIEA          | 1.53         |
| Q12986           | NFX1          | 1.69         | Q04446           | GLGB          | 1.52         |
| P13807           | GYS1          | 1.68         | O95834           | EMAL2         | 1.52         |
| P12235           | ADT1          | 1.66         | Q86W42           | THOC6         | 1.52         |
| P06703           | S10A6         | 1.65         | P00338           | LDHA          | 1.52         |
| P21912           | DHSB          | 1.64         | Q8IVF2           | AHMK2         | 1.52         |
| Q96C23           | GALM          | 1.63         | Q8IWE2           | NXP20         | 1.51         |
| Q16666           | IF16          | 1.62         | P06396           | GELS          | 1.51         |
| P49773           | HINT1         | 1.61         | Q13287           | NMI           | 1.50         |
| P56545           | CTBP2         | 1.61         | Q96Q06           | PLIN4         | 1.50         |
| P04424           | ARLY          | 1.60         | P46977           | STT3A         | 1.50         |
| P29590           | PML           | 1.60         | Q9BQB6           | VKOR1         | 1.50         |

**Supplementary Table 2. List of the down-regulated Proteins**

| Accession | Symbol | Ratio | Accession | Symbol | Ratio |
|-----------|--------|-------|-----------|--------|-------|
| O14735    | CDIPT  | 9.62  | Q9NR56    | MBNL1  | 1.78  |
| Q13190    | STX5   | 7.23  | P20290    | BTF3   | 1.77  |
| P35527    | K1C9   | 3.32  | P02792    | FRIL   | 1.74  |
| P08579    | RU2B   | 3.23  | Q9NWX4    | CD027  | 1.74  |
| P52630    | STAT2  | 3.19  | Q9UI12    | VATH   | 1.73  |
| P55081    | MFAP1  | 3.04  | Q13206    | DDX10  | 1.73  |
| Q13823    | NOG2   | 3.02  | P13073    | COX41  | 1.68  |
| Q9BYN0    | SRXN1  | 2.99  | P98172    | EFNB1  | 1.68  |
| Q08170    | SRSF4  | 2.84  | P10109    | ADX    | 1.67  |
| P18615    | NELFE  | 2.68  | Q96D71    | REPS1  | 1.66  |
| P42345    | MTOR   | 2.52  | O43818    | U3IP2  | 1.66  |
| Q9Y383    | LC7L2  | 2.45  | P51532    | SMCA4  | 1.64  |
| Q6PD62    | CTR9   | 2.38  | Q8N6R0    | MET13  | 1.64  |
| P04264    | K2C1   | 2.25  | Q8NB90    | SPAT5  | 1.63  |
| Q13501    | SQSTM  | 2.24  | P62495    | ERF1   | 1.62  |
| Q9GZN1    | ARP6   | 2.23  | Q92887    | MRP2   | 1.62  |
| P52292    | IMA2   | 2.21  | P29144    | TPP2   | 1.61  |
| Q9BZX2    | UCK2   | 2.20  | O00488    | ZN593  | 1.60  |
| Q9UBU9    | NXF1   | 2.20  | Q8IUE6    | H2A2B  | 1.58  |
| O95183    | VAMP5  | 2.10  | Q9NXR1    | NDE1   | 1.58  |
| P15559    | NQO1   | 2.04  | O43657    | TSN6   | 1.57  |
| Q712K3    | UB2R2  | 2.00  | Q9Y4A5    | TRRAP  | 1.57  |
| Q96T88    | UHRF1  | 1.98  | Q9Y5Q9    | TF3C3  | 1.56  |
| Q8IXT5    | RB12B  | 1.97  | P52732    | KIF11  | 1.55  |
| Q96EI5    | TCAL4  | 1.93  | O00762    | UBE2C  | 1.55  |
| Q8IUH3    | RBM45  | 1.87  | P35249    | RFC4   | 1.55  |
| P33316    | DUT    | 1.85  | P40938    | RFC3   | 1.54  |
| Q8N335    | GPD1L  | 1.84  | P23258    | TBG1   | 1.54  |
| Q9H2U1    | DHX36  | 1.84  | Q6VEQ5    | WASH2  | 1.53  |
| O95551    | TYDP2  | 1.80  | Q969S3    | ZN622  | 1.53  |

**Supplementary Table 2 (continue)**

| Accession | Symbol | Ratio | Accession | Symbol | Ratio |
|-----------|--------|-------|-----------|--------|-------|
| Q10713    | MPPA   | 1.53  | P48681    | NEST   | 1.52  |
| Q96KB5    | TOPK   | 1.52  | Q5M775    | CYTSB  | 1.51  |
| O94804    | STK10  | 1.52  | Q9BQC3    | DPH2   | 1.50  |
| Q15758    | AAAT   | 1.52  | Q9H0B6    | KLC2   | 1.50  |
| Q5T3I0    | GPTC4  | 1.52  | Q6IQ49    | SDE2   | 1.50  |

**Supplementary Table 3. Primary antibodies for western blot, immunoprecipitation, immunohistochemistry and immunofluorescence**

| Antibody       | WB     | IHC   | IF    | IP   | Specificity | Company               |
|----------------|--------|-------|-------|------|-------------|-----------------------|
| TGM2           | 1:2000 | 1:500 | 1:500 | 1:50 | monoclonal  | Abcam                 |
| E-cadherin     | 1:1000 | 1:200 | -     | -    | monoclonal  | CST                   |
| Vimentin       | 1:1000 | 1:200 | -     | -    | monoclonal  | CST                   |
| HIF-1a         | 1:1000 | 1:200 | -     | -    | monoclonal  | Abcam                 |
| PGK1           | 1:1000 | -     | -     | -    | monoclonal  | Abcam                 |
| ENOG           | 1:1000 | -     | -     | -    | monoclonal  | Abcam                 |
| LDHA           | 1:1000 | -     | -     | -    | monoclonal  | CST                   |
| Hydroxy-HIF-1a | 1:1000 | -     | -     | -    | monoclonal  | CST                   |
| VHL            | 1:1000 | -     | -     | -    | monoclonal  | Abcam                 |
| NDRG1          | 1:1000 | -     | -     | -    | polyclonal  | Aviva Systems Biology |
| STAT2          | 1:1000 | -     | -     | -    | monoclonal  | CST                   |
| GAPDH          | 1:1000 | -     | -     | -    | monoclonal  | CST                   |
| Tubulin        | 1:1000 | -     | -     | -    | monoclonal  | CST                   |
| Histone H3     | 1:2000 | -     | -     | -    | monoclonal  | CST                   |

## Supplementary Methods

### Protein extraction, isotopic dimethylation labeling and LC/MS-MS analysis

The whole-cell lysates of the MHCC97H cells with or without co-cultured with LX2 cells were extracted using lysis buffer containing 7M urea (Sigma), 2M thiourea (Sigma) and protease inhibitor (Roche) by continuous vortex at 4°C for 1 hr. After centrifugation at 15000 g for 30 min at 4°C, the protein abundance supernatant was determined using Bradford method, then aliquoted and stored at -80°C. Next, 100µg of protein from each sample was transferred into 10K ultrafiltration tube (Millipore). These proteins were reduced with 10 mM dithiothreitol (60 min, 56°C) and alkylated with 12 mM iodoacetamide in darkness (45 min, 37°C). To remove contaminants, samples were centrifuged by adding 100mM TEAB for three times. 2 µg trypsin (Promega, Madison, WI, USA) was added for overnight digestion at 37°C. After that, tryptic peptides from two samples were isotopically dimethylated as previous study [1]. Briefly, 4µl of 4% CH<sub>2</sub>O (Light) or 4% CD<sub>2</sub>O (Heavy) was added followed by 4µl of 600 mM NaBH<sub>3</sub>CN. The mixture was incubated for 1 h at room temperature. The reaction was quenched with ammonia. The differentially labeled samples were then pooled and desalted using Sep-Pak Vac C18 (Waters, Milford, MA, USA).

The peptide mixture was lyophilized again and dissolved in 20mM ammonium formate in water, pH10.0, adjusted with ammonium hydroxide, and then fractionated by high pH separation using Ultimate 3000 system (ThermoFisher scientific, MA, USA) connected to a reverse phase column (XBridge C18 column, 4.6mm x 250 mm, 5µm, (Waters Corporation, MA, USA). High pH separation was performed using a linear gradient. Starting from 5% B to 45% B in 40 min (B: 20mM ammonium formate in 80% ACN, pH 10.0, adjusted with ammonium hydroxide). 15 offline fractions were collected and dried in a vacuum concentrator. Each fractionation was redissolved in 0.1% formic acid and 5% acetonitrile and injected into the NanoLC-1D Plus HPLC (ABSCIEX, Eksigent Technologies, Dublin, CA) coupled online with a TripleTOF 5600 (AB SCIEX, Framingham, USA). The peptide mixture was separated on a ZORBAX 300SB-C18 column (5 µm particle size, 0.1 mm x 150 mm length, and 300 Å pore size, Agilent, Palo Alto, USA) with a 85 min linear gradient of 5% to 36.5% acetonitrile in 0.1% formic acid. The flow rate was 0.3 µL/min. The mass range was set as 400–1800 m/z. The top 15 precursor peaks were selected for CID.



Three independent experiments were repeated.

### **Bioinformatics Analysis of Differentially Expressed Proteins**

Protein identification and quantification for experiments was carried out using ProteinPilot 4.2 software (Applied Biosystems; MDS-Sciex). Database search was performed against a target-decoy database constructed based on SwissProt Human. Only proteins identified with at least 95% confidence were reported.

To identify proteins that were either up- or down-regulated, the ratios of proteins identified in three independent analyses were averaged. The threshold value that was set for significant regulated proteins in the present study was 1.5 fold.

The bioinformatics analysis of the differentially expressed proteins was performed with Ingenuity Pathways Analysis (IPA) software (2016 summer, Ingenuity Systems, Redwood City, CA, <http://www.ingenuity.com>). The differentially expressed proteins and the corresponding expression values were uploaded into the software and assigned into different molecular and cellular functional classes based upon the underlying biological evidence from the curated Ingenuity Pathways Knowledge Base. Functional networks of these proteins were algorithmically generated based on their connectivity and ranked according to relevancy to the proteins in the input dataset. Canonical pathway analysis identified the pathways, from the IPA library of canonical pathways, which were most significant to the input dataset. The main biological functions of the differentially expressed proteins were also collected from Uniprot protein knowledge database (<http://www.uniprot.org>) and PubMed (<http://www.ncbi.nlm.nih.gov>).

### **Reference**

1. Boersema PJ, Aye TT, Van Veen TA, et al. Triplex protein quantification based on stable isotope labeling by peptide dimethylation applied to cell and tissue lysates. *Proteomics*. 2008; 8(22): 4624-4632.
